# Supplementary material
Source: HighWire-hosted journal article supplement (https://rc.rcjournal.com/highwire/filestream/21713/field_highwire_adjunct_files/0/Danner.pdf)
Supplement: Danner.pdf [file Danner.pdf]

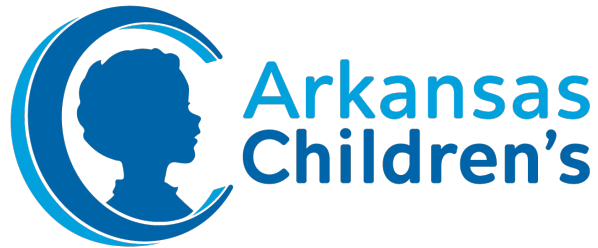

HOSPITALS • RESEARCH • FOUNDATION

# Use of Continuous Albuterol in a Pathway for Treatment of Pediatric Acute Asthma Exacerbation

Nikki Danner<sup>1</sup>, Tera Lloyd<sup>1</sup>, Naisha Carper<sup>1</sup>, Denise Willis<sup>1</sup>, Ariel Berlinski<sup>2</sup>

<sup>1</sup>Respiratory Care Services, Arkansas Children's Hospital, Little Rock, AR;

<sup>2</sup>Department of Pediatrics; University of Arkansas for Medical Sciences,

Pediatric Aerosol Research Laboratory,

Arkansas Children's Research Institute, Little Rock AR

**Disclosures:** Dr. Berlinski is Principal Investigator in studies sponsored by AbbVie, Allergan, Anthera, DCI, Cempra, CFF, NIH, Mylan, TDN, Trudell Medical International, Vertex and Vivus. Science Advisor for International Pharmaceutical Aerosol Consortium on Regulation and Science.

# Introduction

- The use of RT-driven protocols allows for standardization and improves quality of care.
- At our institution, inpatient treatment of acute asthma in children  $\geq 2$  years is managed with a score-based pathway that uses a modified Pediatric Asthma Score (PAS).\*
- The pathway is RT-driven and provides score-based guidance for initiation and discontinuation of continuous albuterol (CA).
- PAS reassessed every 2 hours while receiving CA.

\* Qureshi et. al. N Engl J Med 1998

# Pediatric Asthma Score

| Asthma Severity         | Normal                                             | Mild                         | Moderate                               | Severe                                                          |
|-------------------------|----------------------------------------------------|------------------------------|----------------------------------------|-----------------------------------------------------------------|
| <b>PAS</b>              | 0-4                                                | 5-7                          | 8-11                                   | 12-15                                                           |
| <b>Scoring Factors</b>  | 0                                                  | 1                            | 2                                      | 3                                                               |
| <b>Respiratory Rate</b> |                                                    |                              |                                        |                                                                 |
| <b>2-3 years</b>        | 18-26                                              | 27-34                        | 35-39                                  | ≥40                                                             |
| <b>4-5 years</b>        | 16-24                                              | 25-30                        | 31-35                                  | ≥36                                                             |
| <b>6-12 years</b>       | 14-20                                              | 21-26                        | 27-30                                  | ≥31                                                             |
| <b>&gt; 12 years</b>    | 12-18                                              | 19-23                        | 24-27                                  | ≥28                                                             |
| <b>SpO<sub>2</sub></b>  | >98% on room air                                   | 95-97% on room air           | 90-94% on room air                     | < 90% on room air or on oxygen                                  |
| <b>Auscultation</b>     | Normal breath sounds with good aeration throughout | End-expiratory wheezing only | Expiratory wheezing                    | Inspiratory and expiratory wheezing to diminished breath sounds |
| <b>Retractions</b>      | None                                               | Intercostal                  | Intercostal and substernal             | Intercostal, substernal and supraclavicular                     |
| <b>Dyspnea</b>          | Speaks in complete sentences                       | Speaks in short sentences    | Speaks in partial sentences, short cry | Speaks in single words. Short phrases/grunting                  |

# Asthma Pathway

## ED Management

### PAS 8-11

*(Moderate exacerbation)*

- Albuterol + atrovent nebulized x 3 doses Q20 minutes - OR -
- Continuous albuterol 10-30mg ± atrovent 1.5mg/hr X1hr

#### Consider:

Magnesium IV 50-75 mg/kg (max 2 g) x 1  
Normal Saline (NS) bolus IV fluids

### PAS 12-15

*(Severe exacerbation)*

- Continuous albuterol 10-30mg/hr X1hr ± atrovent 1.5mg/hr

#### Consider:

Magnesium IV 50-75mg/kg (max 2 g) X1 (give over 20 minutes)  
SQ epinephrine 0.01mg/kg (max 0.5mg) X1  
SQ terbutaline 0.01mg/kg (max 0.5mg) X1  
Inhaled racemic epinephrine  
Increase albuterol dose  
NIPPV/BiPAP  
Normal Saline (NS) bolus IV fluids

## General Pediatrics or Pulmonary

### PHASE IV (IMU)

- Continuous albuterol 10-30mg/hr

#### Q2hr assessment

Provide IVF with 40meq KCl  
Q8hrs K+ lab

Transfer to CCM if PAS 14-15 or requiring continuous albuterol for >12hrs

Continue PHASE IV if PAS 12-13  
Advance to PHASE V after 4hrs of treatment if PAS 0-11 and consider transfer to floor

### PHASE V (Floor)

Albuterol MDI 4-8 puffs/Nebulized 2.5-5mg Q2 x2  
PRN albuterol for PAS > 4

#### Q2hr assessments

Provide IVFs with 20meq KCl

Step back to PHASE IV if PAS ≥ 11, transfer to IMU, and consider CCM consult  
Advance to PHASE VI after 4hrs if PAS <11

## Critical Care Medicine

### PHASE I (PICU)

- Continuous albuterol 10-30mg/hr
- AND:  
(any of the following)  
Magnesium IV 50-75mg/kg (max 2 grams)  
SQ epinephrine 0.01mg/kg (max 0.5mg)  
SQ terbutaline 0.01mg/kg (max 0.5mg)  
Inhaled epinephrine  
Increase albuterol dose  
NIPPV/BiPAP  
Intubation

#### Q1-2hr assessment

Provide IVF with 40meq KCl  
Q8hrs K+ lab

Continue PHASE I if PAS >11  
Advance to PHASE II after 2hrs of treatment if PAS 0-11

### PHASE II (PICU/IMU)

- Continuous albuterol 10-30mg/hr

#### Q2hr assessment

Provide IVF with 40meq KCl  
Q8hrs K+ lab

Step back to PHASE I if PAS 14-15  
Continue PHASE II if PAS 12-13  
Advance to PHASE III after 4hrs of treatment if PAS 0-11

### PHASE III (PICU/IMU)

- Albuterol MDI 4-8 puffs/Nebulized 2.5-5mg Q2 x2

#### Q2hr assessments

Provide IVFs with 20meq KCl

Step back to PHASE II if PAS ≥ 11  
Transfer to PHASE V Pulmonary after 4hrs if PAS <11

# Introduction

- A large volume nebulizer (LVN) is used to administer CA unless receiving additional respiratory support.
- A vibrating mesh nebulizer (VMN) is used to deliver CA while receiving respiratory support such as high flow nasal cannula (HFNC) or non-invasive ventilation (NIV).
- CA use was evaluated during asthma exacerbation treatment with the asthma pathway as part of a quality improvement process.

# Methods

- Inclusion criteria:
  - Children  $\geq 2$  years of age admitted for acute asthma 11/2017–12/2019
  - Admitted to PICU or step-down unit
  - Received CA as part of asthma pathway
- Subsequent admissions excluded
- Data collected retrospectively:
  - Subject demographics
  - Asthma classification
  - CA dose / duration
  - Nebulizer type
  - PAS
  - Respiratory support during CA
  - Prescribed inhaled corticosteroid (ICS)
  - Length of stay
  - Readmissions or ED visits within 30 days of discharge
- Descriptive statistics

# Results

| Subject Characteristics    |                                                                                              |
|----------------------------|----------------------------------------------------------------------------------------------|
| <b>Overall</b>             | 412 children<br>Median age 6 (IQR 4-10) years<br>71% admitted from ED to step-down           |
| <b>Sex<br/>n (%)</b>       | Female 161 (39)<br>Male 251 (61)                                                             |
| <b>Race<br/>n (%)</b>      | Black 247 (60)<br>White 119 (29)<br>Asian 2 (<1)<br>Pacific Islander 2 (<1)<br>Other 42 (10) |
| <b>Ethnicity<br/>n (%)</b> | Not Hispanic 382 (93)<br>Hispanic 28 (7)<br>Unknown 2 (<1)                                   |

### Asthma Classification

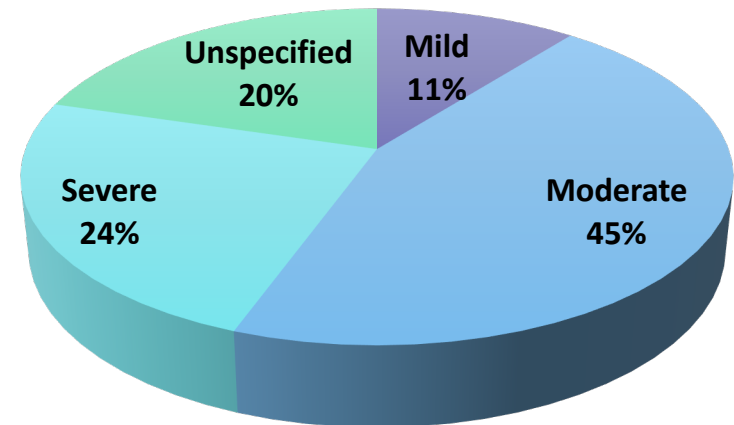

- Median initial CA dose 15 (IQR 10-20) mg/hr
- Median time on CA 560 (IQR 355– 998) min
- LVN 71%, VMN 14%

# Results

| PAS timing | PAS<br>Median (IQR 25-75) | Missing PAS<br>n (%) |
|------------|---------------------------|----------------------|
| Before CA  | 11 (IQR 10-12)            | 66 (16)              |
| During CA  | 11 (IQR 9-12)             | 8 (2)                |
| After CA   | 6 (IQR 5-8)               | 9 (2)                |

- 121 (29%) children required respiratory support
- CA restarted in 12 (3%) subjects
- 7 (2%) required transfer to PICU
- No pneumothoraces or deaths
- 202 (49%) prescribed ICS prior to admit
- Median LOS 1.4 (IQR 0.8-2.3) days
- 16 (4%) ED visits and 3 (<1%) readmissions within 30 days of discharge

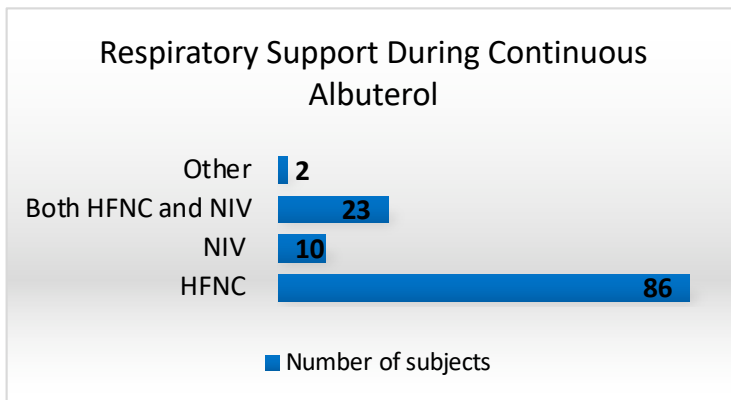



# Discussion

- Asthma protocols can improve patient outcomes and increase adherence to treatment guidelines.<sup>1,2</sup>
- PAS utilization is a common practice with asthma management protocols.<sup>3,4</sup>
- CA is generally safe and well tolerated.<sup>5</sup>
- Limitations:
  - Retrospective study
  - Missing PAS documentation
  - Prescribed ICS - did not evaluate adherence

1. Kucher et al Respir Care 2021
2. Miller et al Respir Care 2015
3. Gorelick et al Acad Emerg Med 2004
4. Arnold et al Am Allergy Asthma Immunol 2011
5. Camargo et al Cochran Sys Review 2003

# Conclusions

- The use of a RT-driven, score-based pathway for initiation and discontinuation of CA for treatment of pediatric asthma exacerbation was safe with low complication rates.
- Readmissions or ED visits within 30 days of discharge were infrequent.
- Efforts towards increasing documentation before starting CA are warranted.
